# Supplementary material for: Electron Temperature in a Cold Plasma in a Strong Electric Field
Source: MDPI journal article supplement (doi:10.3390/ijms241310433), 1973-03-01
Supplement: s1 [file s1]

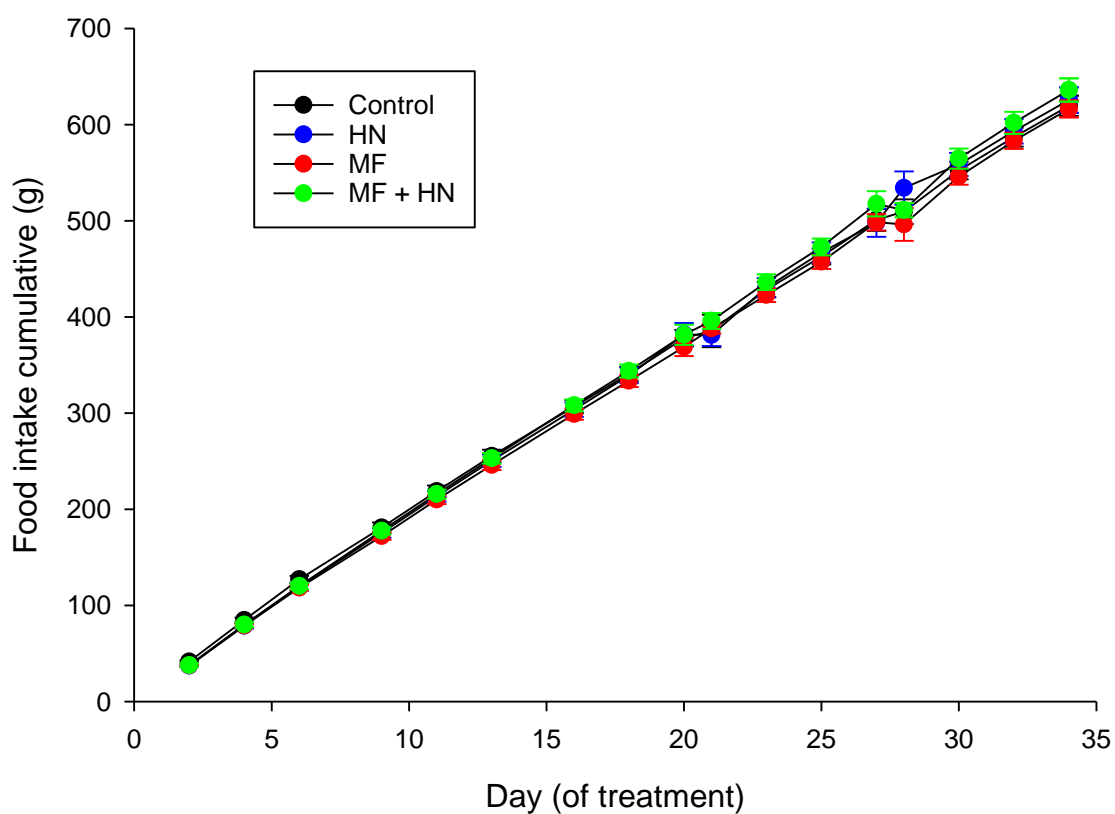

**Supplementary Figure S1.** Food intake over the duration of the study for: HN; *Lactaseibacillus rhamnosus* strain HN001 (LactoB HN001™), MF; milk fat globule membrane (Surestart™ MFGM Lipid 70).

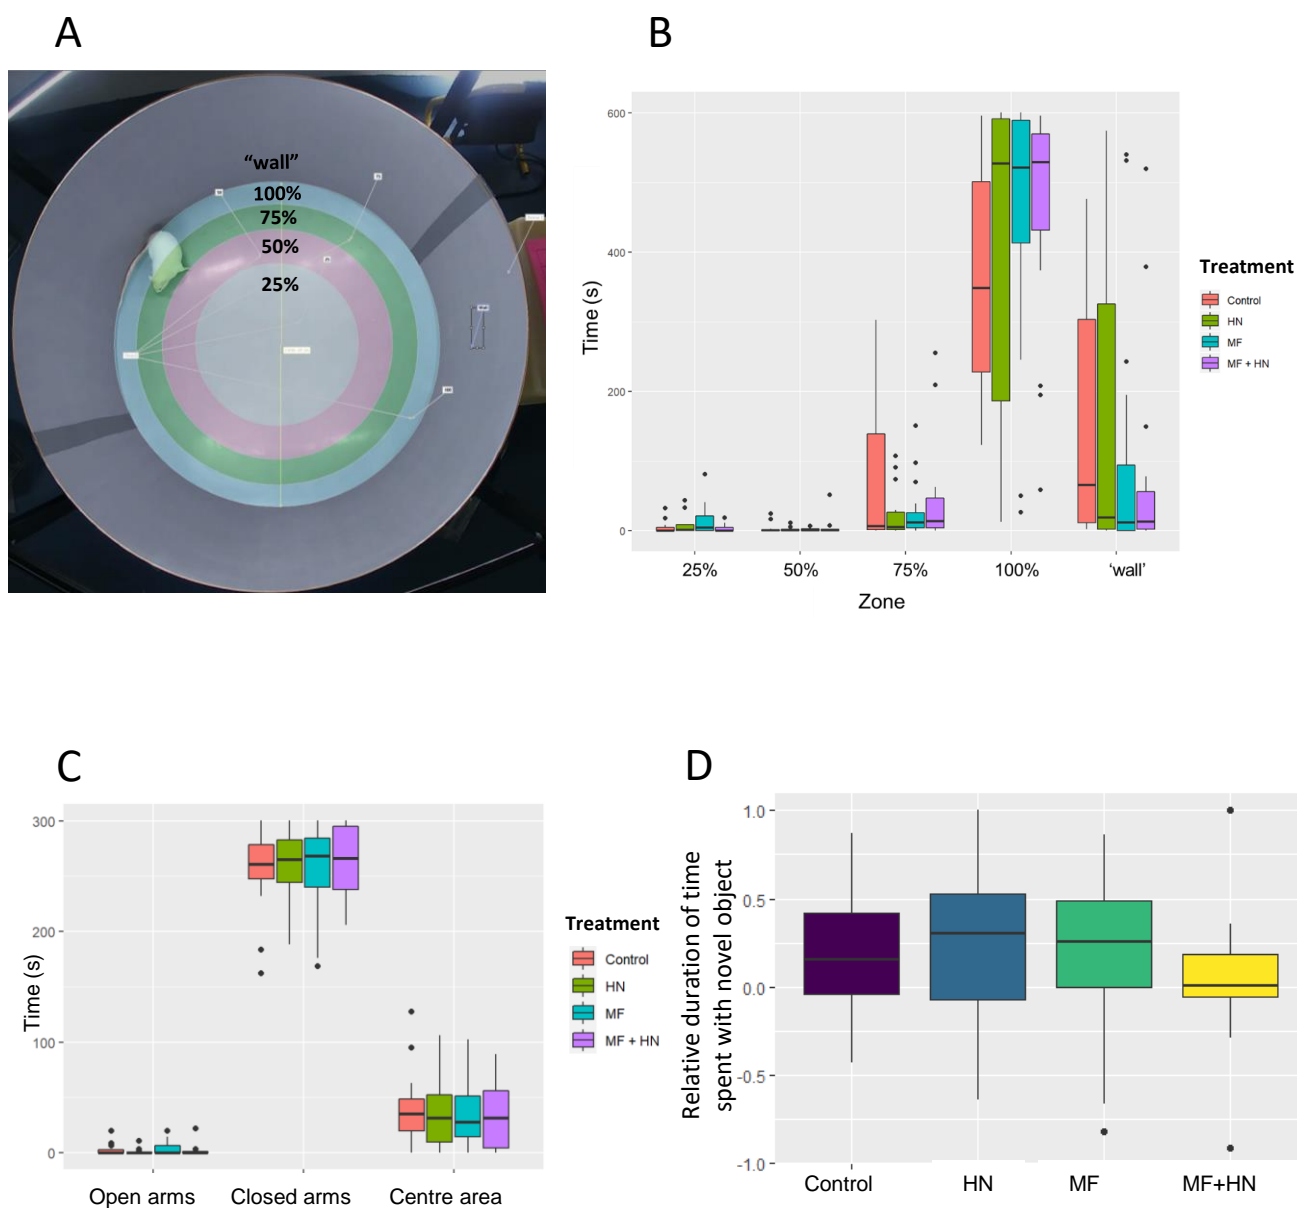

**Supplementary Figure S2.** (A) The open field test arena is divided into zones from the center 25% (white), 50% (pink), 75% (green), 100% (blue), to the wall (grey) and (B) shows corresponding results for time spent in each zone for each treatment group. Rats fed treatment diets did not show any difference in velocity, or distance travelled, entry to the inner zone of the arena or time spent in the inner zone compared with control animals. The PERMANOVA also found no evidence of an impact of diet or pre-study weight on the behaviour exhibited by the animals in the test. (C) In the elevated plus maze, rats fed treatment diets did not spend any more time in the open arms than control rats. (D) In the novel object recognition test rats fed treatment diets did not spend any more time than control animals exploring the novel versus the familiar object (relative duration = time spent with the novel object minus the time spent with the familiar object divided by the total time for both objects). HN; *Lactocaseibacillus rhamnosus* strain HN001 (LactoB HN001™), MF; milk fat globule membrane (Surestart™ MFGM Lipid 70).

| Accession#          | Gene name        | Probe function | Accession#          | Gene name        |
|---------------------|------------------|----------------|---------------------|------------------|
| ERCC_00126.1:220    | NEG_F (0) **     | Negative       | NM_001035233.1:1198 | Slc1a2 (Glt-1) * |
| ERCC_00098.1:785    | NEG_E (0) **     | Negative       | NM_012570.1:1370    | Glud1            |
| ERCC_00019.1:140    | NEG_C (0) **     | Negative       | NM_012767.2:326     | Gnrh1            |
| ERCC_00096.1:230    | NEG_A (0) **     | Negative       | NM_031608.1:855     | Gria1            |
| ERCC_00041.1:440    | NEG_B (0) **     | Negative       | NM_017261.2:1532    | Gria2            |
| ERCC_00076.1:355    | NEG_D (0) **     | Negative       | NM_001112742.1:1246 | Gria3            |
| ERCC_00034.1:195    | POS_A (128) **   | Positive       | NM_133560.2:1066    | Trak2 (GRIF-1) * |
| ERCC_00092.1:540    | POS_D (2) **     | Positive       | NM_017241.2:615     | Grik1            |
| ERCC_00117.1:385    | POS_F (0.125) ** | Positive       | NM_019309.2:2450    | Grik2            |
| ERCC_00002.1:850    | POS_C (8) **     | Positive       | NM_012572.1:1625    | Grik4            |
| ERCC_00112.1:695    | POS_B (32) **    | Positive       | NM_031508.2:1060    | Grik5            |
| ERCC_00035.1:485    | POS_E (0.5) **   | Positive       | NM_017010.1:2615    | Grin1            |
| NM_013034.3:586     | Slc6a4 (5HTT) *  | reference      | NM_012573.2:3365    | Grin2a           |
| NM_001109883.2:880  | Abcf1            | reference      | NM_012574.1:3170    | Grin2b           |
| NM_017015.2:1730    | Gusb             | reference      | NM_012575.3:2348    | Grin2c           |
| NM_017025.1:1360    | Ldha             | reference      | NM_022797.1:3296    | Grin2d           |
| NM_031773.1:2785    | Polr1b           | reference      | NM_001114330.1:1897 | Grm1             |
| NM_022402.2:1       | Rplp0            | reference      | NM_001105712.1:2575 | Grm3             |
| NM_030991.1:725     | Snap25           | reference      | NM_022666.1:2161    | Grm4             |
| NM_053788.2:1620    | Stx1a            | reference      | NM_017012.1:2135    | Grm5             |
| NM_053859.1:790     | Slc17a7          | reference      | NM_031040.1:1435    | Grm7             |
| NM_012583.2:20      | Hprt             | reference      | NM_022202.1:1960    | Grm8             |
| NM_031003.2:382     | Abat             |                | NM_012585.1:600     | Htr1a            |
| NM_022193.1:2518    | Acaca            |                | NM_022225.1:615     | Htr1b            |
| NM_012739.2:1155    | Adra2a           |                | NM_012852.1:560     | Htr1d            |
| NM_012513.4:637     | Bdnf             |                | NM_021857.1:215     | Htr1f            |
| NM_031561.2:1470    | Cd36             |                | NM_017254.1:440     | Htr2a            |
| NM_012531.2:1070    | Comt             |                | NM_012765.3:789     | Htr2c            |
| NM_001034925.2:2264 | Cpt1c            |                | NM_024394.2:1030    | Htr3a            |
| NM_001007703.1:1810 | Cptp             |                | NM_012853.1:20      | Htr4             |
| NM_031019.1:625     | crf              |                | NM_022938.2:520     | Htr7             |
| NM_012546.2:1077    | Drd1             |                | NM_012854.2:185     | Il10             |
| NM_012547.1:2353    | Drd2             |                | NM_022611.1:364     | Il12b            |
| NM_012768.1:310     | Drd5             |                | NM_053828.1:200     | Il13             |
| NM_001191796.1:478  | Elov4            |                | NM_001106897.1:615  | Il17a            |
| NM_134383.2:266     | Elov6            |                | NM_019165.1:110     | Il18             |
| NM_172036.2:180     | Gabarap          |                | NM_017019.1:580     | Il1a             |
| NM_031028.3:1225    | Gabbr1           |                | NM_031512.1:440     | Il1r1            |
| NM_031802.1:590     | Gabbr2           |                | NM_053836.1:5       | Il2              |
| NM_183326.2:1157    | Gabra1           |                | NM_012589.1:55      | Il6              |
| NM_001135779.1:1130 | Gabra2           |                | XM_342346.3:3560    | Nfkb1            |
| NM_080587.3:715     | Gabra4           |                | NM_052799.1:56      | Nos1             |
| NM_017295.1:842     | Gabra5           |                | NM_019256.1:2815    | P2rx7            |
| NM_021841.1:1050    | Gabra6           |                | NM_001002853.1:170  | P2ry13           |
| NM_012956.1:750     | Gabrb1           |                | NM_001077641.1:2579 | Plcb1            |
| NM_012957.2:800     | Gabrb2           |                | NM_013196.1:1010    | Ppara            |
| NM_017289.1:410     | Gabrd            |                | NM_013141.2:1186    | Pparg            |
| NM_023091.1:2550    | Gabre            |                | NM_181386.2:1195    | Sgms1            |
| NM_080586.1:1244    | Gabrg1           |                | NM_022851.1:974     | Aldh5a1          |
| NM_183327.1:670     | Gabrg2           |                | NM_012675.2:305     | Tnf (tnfa) *     |
| NM_017007.1:260     | Gad1             |                | NM_001100634.2:2202 | Tph1             |
| NM_012563.1:585     | Gad2             |                | NM_173839.2:1580    | Tph2             |
| NM_017335.1:1950    | Slc6a1 (Gat1) *  |                |                     |                  |
| NM_133623.1:1508    | Slc6a13 (Gat2) * |                |                     |                  |
| NM_024372.1:1390    | Slc6a11 (Gat3) * |                |                     |                  |
| NM_012569.2:982     | Gls              |                |                     |                  |

**Supplementary Table S1. NanoString nCounter Codeset probe list for brain tissue gene expression.** The Codeset has a custom probe design of 12 control, 10 reference and 87 target genes. They are listed by RefSeq Accession numbers, Probeset ID (Official Gene names) and probe function. ( ) \* Trial name of gene that differs to Official Gene Name ( ) \*\* Concentration of positive and negative control probes

## Amygdala

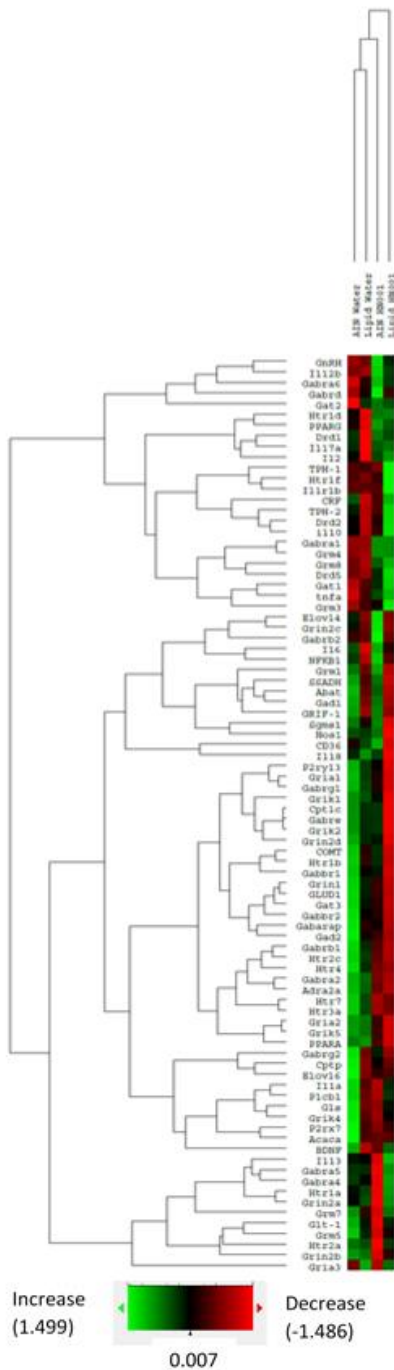

## Hippocampus

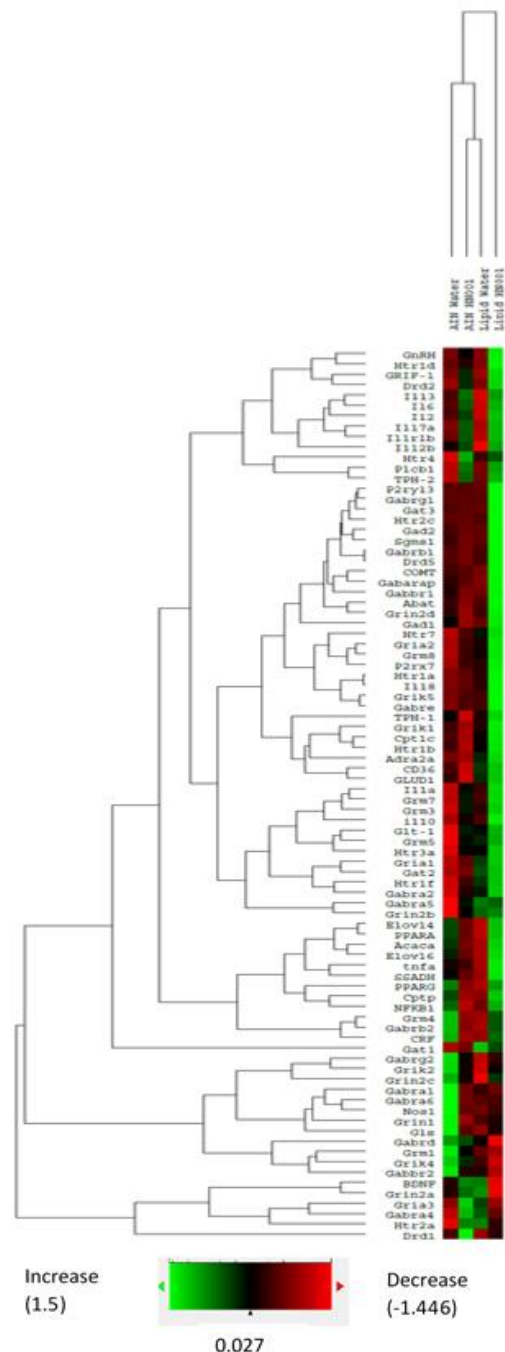

**Supplementary Figure S3.** Heatmaps of gene expression in the Amygdala and Hippocampus for the four treatment groups: AIN water (control), AIN HN001, Lipid water, Lipid HN001, by the 86 genes in the custom panel (excl. housekeeping genes). The Z-score transformation is by “Genes” with sample counts averaged for each treatment group using “Euclidean Distance” as the distance matrix. Increased expression is shown as “green”, and decreased expression is shown as “red”. HN001; *Lactacaseibacillus rhamnosus* strain HN001 (LactoB HN001™), Lipid; milk fat globule membrane (Surestart™ MFGM Lipid 70).

| Tissue | Treatment   | Gene            | log2(FC) | FDR    | Expression |
|--------|-------------|-----------------|----------|--------|------------|
| Amy    | AIN HN001   | <i>Grm4</i>     | 1.05     | 0.0394 | increased  |
| Amy    | Lipid HN001 | <i>Gabre</i>    | -2.11    | 0.0163 | decreased  |
| Amy    | Lipid HN001 | <i>Gat3</i>     | -0.73    | 0.0163 | decreased  |
| Amy    | Lipid HN001 | <i>Gabrg1</i>   | -0.418   | 0.043  | decreased  |
| Hip    | Lipid HN001 | <i>Gabrd</i>    | -1.13    | 0.0357 | decreased  |
| Amy    | Lipid HN001 | * <i>Gria1</i>  | -0.457   | 0.053  | decreased  |
| Amy    | Lipid HN001 | * <i>Gabrb1</i> | -0.394   | 0.0547 | decreased  |
| Amy    | Lipid HN001 | * <i>Htr4</i>   | -0.733   | 0.0674 | decreased  |
| Amy    | Lipid HN001 | * <i>Rplp0</i>  | -0.234   | 0.0674 | decreased  |
| Amy    | Lipid HN001 | * <i>GLUD1</i>  | -0.363   | 0.0674 | decreased  |
| Amy    | Lipid HN001 | * <i>Gabbr1</i> | -0.286   | 0.0674 | decreased  |
| Amy    | Lipid HN001 | * <i>Gabra2</i> | -0.433   | 0.0674 | decreased  |
| Amy    | Lipid HN001 | * <i>Grik2</i>  | -0.321   | 0.074  | decreased  |
| Amy    | Lipid HN001 | * <i>Grik1</i>  | -0.348   | 0.074  | decreased  |
| Amy    | Lipid HN001 | * <i>COMT</i>   | -0.243   | 0.0759 | decreased  |
| Amy    | Lipid HN001 | * <i>Nos1</i>   | -0.41    | 0.0857 | decreased  |
| Amy    | Lipid HN001 | * <i>Htr2c</i>  | -0.619   | 0.0857 | decreased  |
| Amy    | Lipid HN001 | * <i>Grm3</i>   | 0.216    | 0.0997 | increased  |

**Supplementary Table S2. Differential expression analysis** using a lm.nb (log-linear negative binomial model) within the nSolver software. Significance values (FDR < 0.05) and log2fold changes (> 0.263) are relative to control group (AIN diet and water). *Grm4* (metabotropic glutamate receptor), *Gabre* (GABA A receptor epsilon subunit), *Gat3* (brain-specific GABA transporter), *Gabrg1* (GABA A receptor gamma 1 subunit), *Gabrd* (GABA A receptor delta subunit). Genes with FDR values of > 0.05 < 0.1 show trends towards altered expression in the Amygdala. HN001; *Lactocaseibacillus rhamnosus* strain HN001 (LactoB HN001™), Lipid; milk fat globule membrane (Surestart™ MFGM Lipid 70).

| Level 1            | Level 2                                     | Level 3                                       | Level 4                                                                   | logF<br>C | FDR     |
|--------------------|---------------------------------------------|-----------------------------------------------|---------------------------------------------------------------------------|-----------|---------|
| Cell Envelope      | Cell Envelope, Capsule and Slime layer      | Capsule and Slime layer                       | Alginate biosynthesis                                                     | -0.4      | 0.0192  |
| Cell Envelope      | Cell Envelope, Capsule and Slime layer      | Capsule and Slime layer                       | Lipid-linked oligosaccharide synthesis related cluster                    | 0.52      | 0.034   |
| Cell Envelope      | Cell Envelope, Capsule and Slime layer      | Cell wall of Mycobacteria                     | Mycobacterial cell wall virulence lipid phthiocerol dimycocerosate (PDIM) | -1.22     | 0.0068  |
| Cell Envelope      | Cell Envelope, Capsule and Slime layer      | Gram-Positive (Monoderm) cell wall components | D-alanylation of teichoic acid                                            | 0.82      | 0.0007  |
| Cellular Processes | Microbial communities                       | Quorum sensing and biofilm formation          | Autoinducer 2 (AI-2) transport and processing (lsrACDBFGE operon)         | 0.39      | 0.0025  |
| Cellular Processes | Prokaryotic cell type differentiation       | Sporulation                                   | Spore germinant receptors                                                 | 0.4       | 0.0107  |
| Energy             | Energy and Precursor Metabolites Generation | Central Metabolism                            | Butyrate kinase pathway                                                   | -0.39     | 0.0006  |
| Energy             | Energy and Precursor Metabolites Generation | Central Metabolism                            | Dihydroxyacetone kinases                                                  | 0.29      | 0.0234  |
| Energy             | Energy and Precursor Metabolites Generation | Central Metabolism                            | Pyruvate formate-lyase cluster                                            | 0.3       | 0.0272  |
| Energy             | Respiration                                 | Electron donating reactions                   | Energy-conserving hydrogenase (ferredoxin)                                | -0.95     | 0.0001  |
| Metabolism         | Amino Acids and Derivatives                 | Arginine_ urea cycle, creatine, polyamines    | Anaerobic Oxidative Degradation of L-Ornithine                            | 0.32      | 0.0022  |
| Metabolism         | Amino Acids and Derivatives                 | Arginine_ urea cycle, creatine, polyamines    | Cyanophycin Metabolism                                                    | 0.31      | 0.0263  |
| Metabolism         | Amino Acids and Derivatives                 | Arginine_ urea cycle, creatine, polyamines    | Methylhydantoinase                                                        | 0.5       | 0.0048  |
| Metabolism         | Amino Acids and Derivatives                 | Lysine, threonine, methionine, and cysteine   | Fructoselysine and glucoselysine                                          | 1.03      | >0.0001 |
| Metabolism         | Amino Acids and Derivatives                 | Lysine, threonine, methionine, and cysteine   | Lysine fermentation to crotonoyl-CoA                                      | 0.54      | >0.0001 |
| Metabolism         | Amino Acids and Derivatives                 | Lysine, threonine, methionine, and cysteine   | S-methylmethionine                                                        | 1.21      | 0.0032  |
| Metabolism         | Carbohydrates                               | Amino sugars and nucleotide sugars            | Hyaluronate utilization                                                   | 0.29      | 0.0001  |
| Metabolism         | Carbohydrates                               | C-1 compound metabolism                       | Formaldehyde assimilation: Ribulose monophosphate pathway                 | 0.62      | 0.0003  |
| Metabolism         | Carbohydrates                               | Carboxylic acids                              | Alpha-acetolactate operon                                                 | 0.95      | 0.0116  |
| Metabolism         | Carbohydrates                               | Monosaccharides                               | L-ascorbate utilization (and related gene clusters)                       | 0.54      | 0.012   |
| Metabolism         | Carbohydrates                               | Sugar alcohols                                | Propanediol utilization                                                   | 0.39      | 0.0001  |
| Metabolism         | Cofactors, Vitamins, Prosthetic Groups      | Folate and pterines                           | p-Aminobenzoyl-Glutamate Utilization                                      | 0.44      | >0.0001 |
| Metabolism         | Cofactors, Vitamins, Prosthetic Groups      | Quinone cofactors                             | Menaquinone biosynthesis from chorismate via 1,4-dihydroxy-6-naphthoate   | -0.35     | 0.0051  |
| Metabolism         | Cofactors, Vitamins, Prosthetic Groups      | Quinone cofactors                             | Pyrroloquinoline Quinone biosynthesis                                     | 0.65      | 0.0007  |
| Metabolism         | Cofactors, Vitamins, Prosthetic Groups      | Thiamin                                       | Biosynthesis of thiamin antivitamin Bacimethrin                           | 0.51      | 0.0099  |

| Level 1                             | Level 2                                                      | Level 3                                       | Level 4                                                                                                 | logFC | FDR     |
|-------------------------------------|--------------------------------------------------------------|-----------------------------------------------|---------------------------------------------------------------------------------------------------------|-------|---------|
| Metabolism                          | Cofactors, Vitamins, Prosthetic Groups                       | Quinone cofactors                             | Pyrroloquinoline Quinone biosynthesis                                                                   | 0.65  | 0.0007  |
| Metabolism                          | Cofactors, Vitamins, Prosthetic Groups                       | Thiamin                                       | Biosynthesis of thiamin antivitamin Bacimethrin                                                         | 0.51  | 0.0099  |
| Metabolism                          | Cofactors, Vitamins, Prosthetic Groups                       | Thiamin                                       | Thiamin, hydroxymethylpyrimidine selected transporters                                                  | 0.81  | 0.0075  |
| Metabolism                          | Fatty Acids, Lipids, and Isoprenoids                         | Fatty acids                                   | Enoyl-[ACP] reductases disambiguation                                                                   | 0.53  | 0.0494  |
| Metabolism                          | Fatty Acids, Lipids, and Isoprenoids                         | Isoprenoids                                   | Acyclic terpene utilization                                                                             | -1.12 | 0.027   |
| Metabolism                          | Fatty Acids, Lipids, and Isoprenoids                         | Isoprenoids                                   | Mevalonate metabolic pathway                                                                            | 0.96  | 0.0081  |
| Metabolism                          | Iron acquisition and metabolism                              | Siderophores                                  | Siderophore Mycobactin                                                                                  | -0.92 | 0.0005  |
| Metabolism                          | Iron acquisition and metabolism                              | Siderophores                                  | Siderophore Pyoverdine                                                                                  | -0.96 | 0.0016  |
| Metabolism                          | Nucleosides and Nucleotides                                  | Purines                                       | Purine catabolism in Bacillus subtilis                                                                  | 0.28  | 0.0022  |
| Metabolism                          | Nucleosides and Nucleotides                                  | Purines                                       | Xanthine dehydrogenase subunits                                                                         | 0.35  | >0.0001 |
| Miscellaneous                       | Prophages, Transposable elements, Plasmids                   | Phages, Prophages                             | P2-like phage                                                                                           | -0.36 | 0.0426  |
| Protein Processing                  | Protein Fate (folding, modification, targeting, degradation) | Protein glycosylation in Prokaryotes          | N,N'-diacetylbacillosamine                                                                              | -0.54 | 0.007   |
| Protein Processing                  | Protein Fate (folding, modification, targeting, degradation) | Protein targeting, sorting, translocation     | SecY2-SecA2 Specialized Transport System                                                                | 0.61  | 0.0022  |
| Protein Processing                  | Protein Fate (folding, modification, targeting, degradation) | Selenoproteins                                | Glycine reductase, sarcosine reductase and betaine reductase                                            | 0.49  | >0.0001 |
| Protein Processing                  | Protein Fate (folding, modification, targeting, degradation) | Selenoproteins                                | Selenocysteine metabolism                                                                               | 0.48  | >0.0001 |
| Protein Processing                  | Protein Synthesis                                            | Aminoacyl-tRNA-synthetases                    | tRNA aminoacylation, Pyr                                                                                | 0.83  | 0.0065  |
| Stress Response, Defense, Virulence | Stress Response, Defense and Virulence                       | Resistance to antibiotics and toxic compounds | Aminoglycoside modifying enzymes: O-phosphotransferases                                                 | -0.68 | >0.0001 |
| Stress Response, Defense, Virulence | Stress Response, Defense and Virulence                       | Resistance to antibiotics and toxic compounds | Beta-lactamases Ambler class B                                                                          | 0.47  | 0.0008  |
| Stress Response, Defense, Virulence | Stress Response, Defense and Virulence                       | Resistance to antibiotics and toxic compounds | Macrolides, lincosamides, streptogramins, ketolides, oxazolidinones (MLSKO) resistance: rRNA methylases | -1.05 | >0.0001 |

**Supplementary Table S3. Functional genes annotated to the SEED database** at level 4 with significant differential abundances (FDR<0.05, |logFC| > 0.263) between rats fed the control non-Lipid 70 diet or Lipid 70 (Surestart™ MFGM Lipid 70). Positive logFC value indicates higher abundance in Lipid 70 group, while negative logFC value indicates higher abundance in the non-Lipid 70 group.

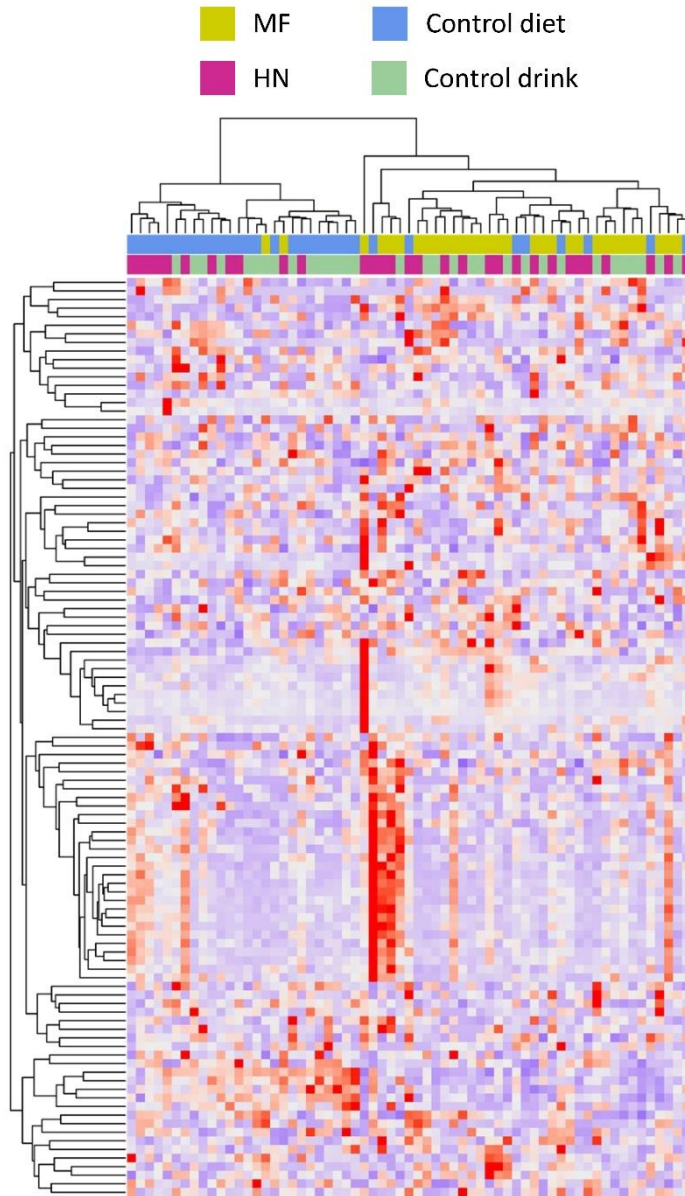

**Supplementary Figure S4.** Heatmap showing hierarchical clustering of SEED level 4 function profiles in the caecal metagenome for functions that exhibit the greatest variation (top 5% coefficient of variation) in abundance across all rats, regardless of group. SEED functions in rows and rats represented by each column. Colour bar across top indicates treatment group for each rat, showing whether they received the control AIN diet (blue), MF diet (yellow), plain drinking water control (green) or HN probiotic in drinking water (magenta). HN; *Lactocaseibacillus rhamnosus* strain HN001 (LactoB HN001™), MF; milk fat globule membrane (Surestart™ MFGM Lipid 70).



A

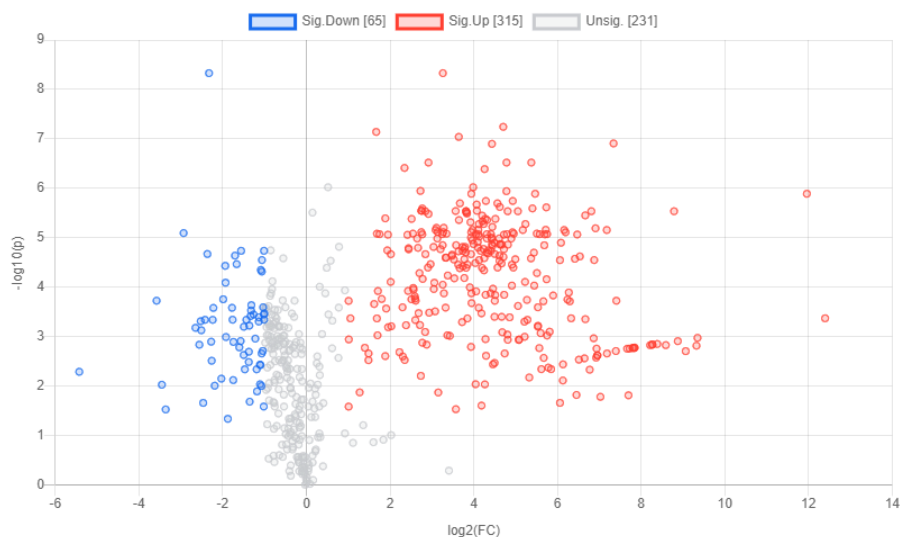

B

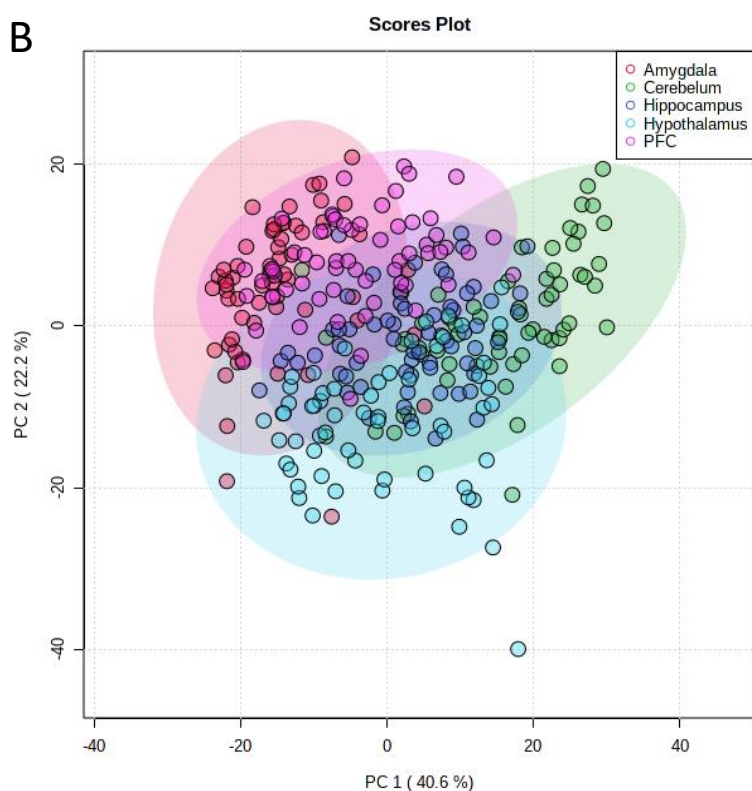

**Supplementary Figure S5.** (A) Volcano plot of lipids significantly differentiating (FDR p-value <0.05, Fold-change>2) between the two diets with 315 lipids higher in the MF and 65 lower in the MF compared to the control diet. (B) Principal component analysis score plot of brain lipids detected across the 5 brain regions. MF; milk fat globule membrane (Surestart™ MFGM Lipid 70).

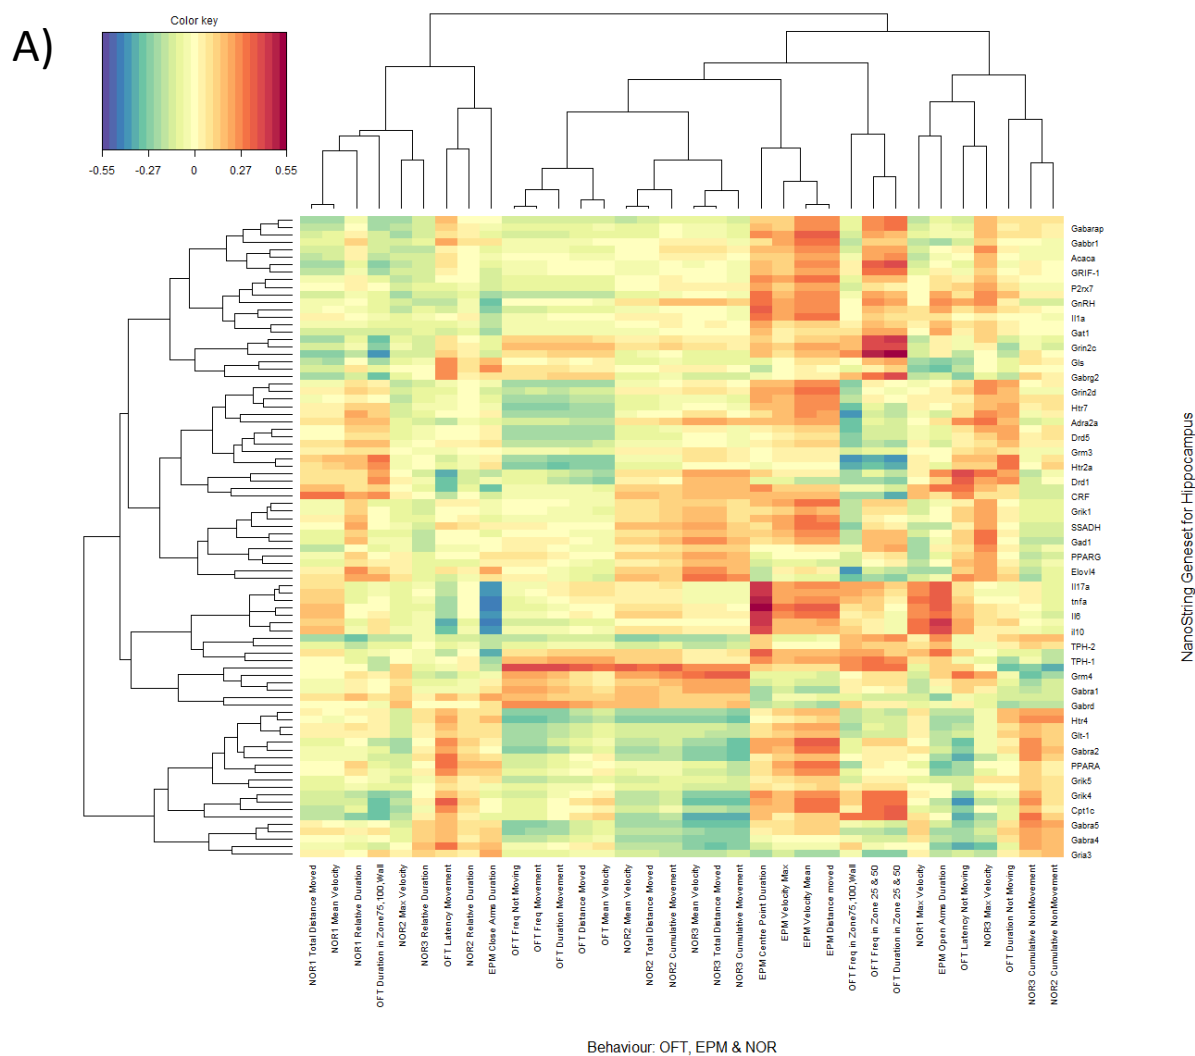

**B)**

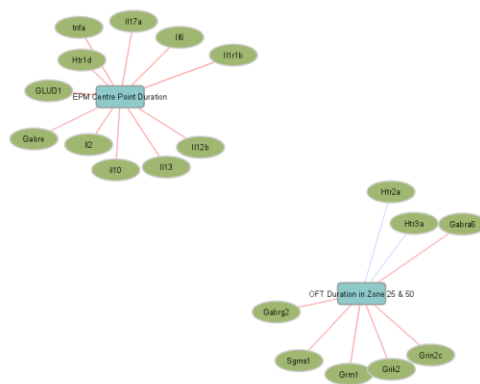

**Supplementary Figure S6.** Correlations obtained with sPLS – canonical on selected Behaviour measurements and gene expression counts in the Hippocampus. Heatmap (A) indicating hierarchical clustering of correlations between subsets of variables are described in the “Colour Key”, with positive (red), negative (blue) and weak shown as lighter colours. Relevance networks show the pair-wise similarity matrix of correlated positive (red) and negative (blue) variables. Behaviour and gene expression variables are represented as rectangles and ellipses respectively.

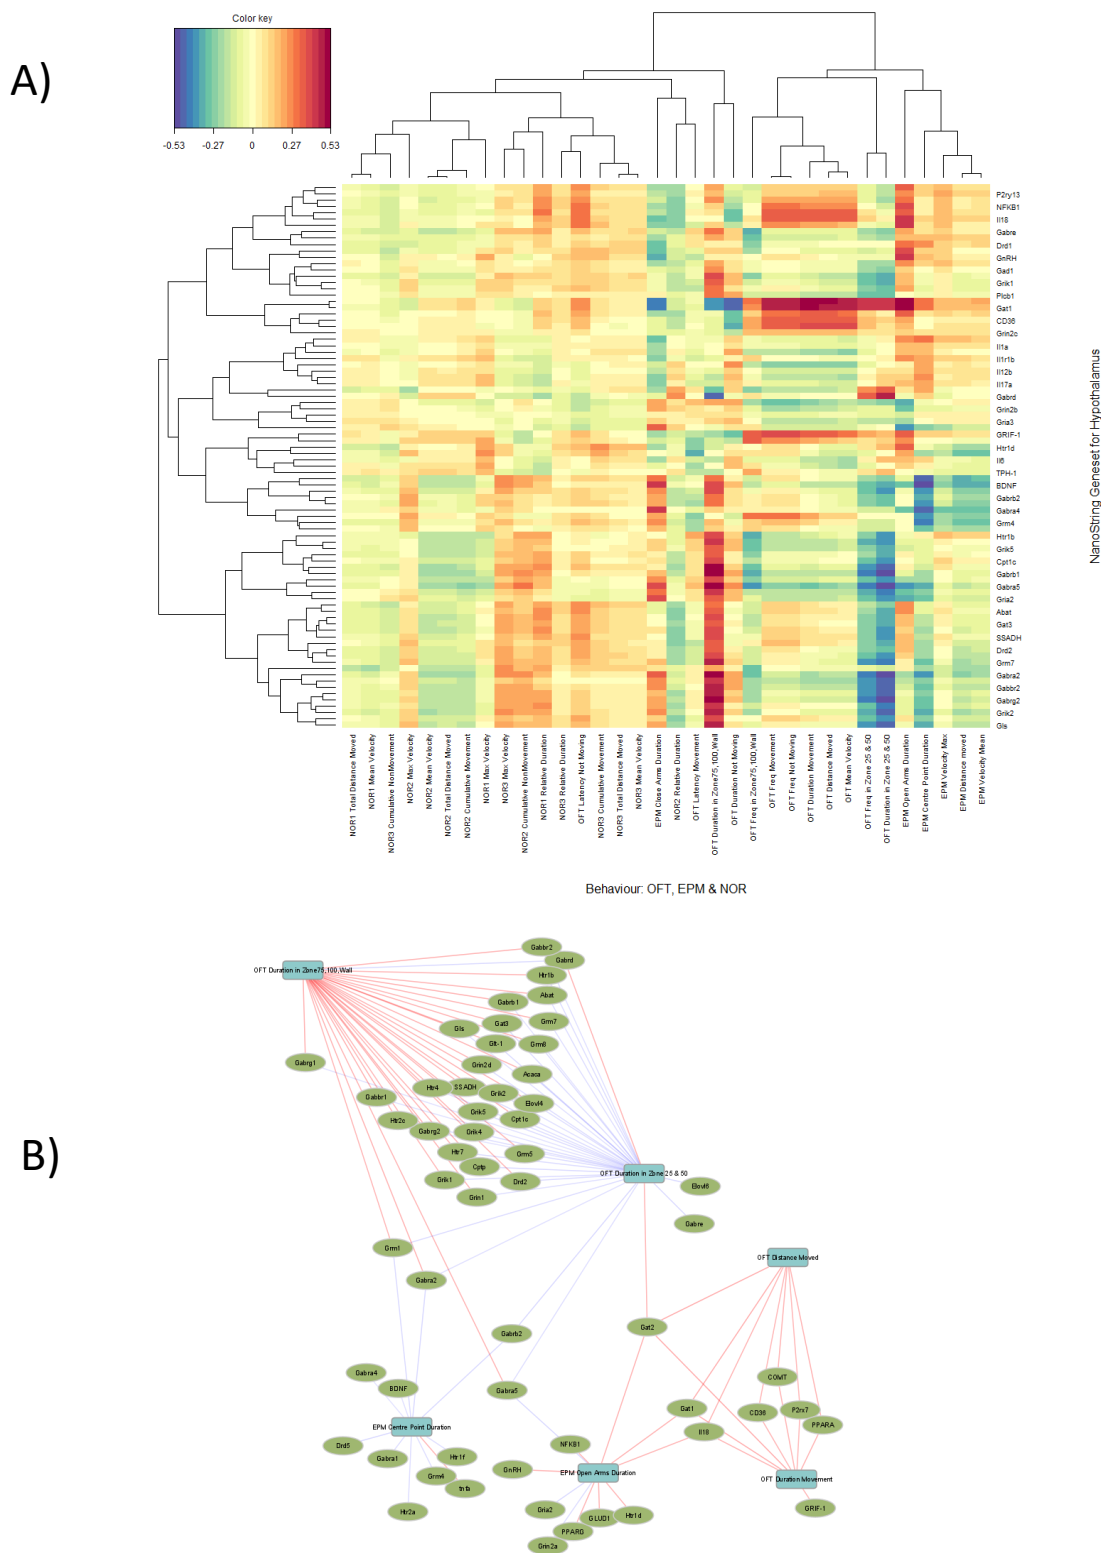

**Supplementary Figure S7.** Correlations obtained with sPLS – canonical on selected Behaviour measurements and gene expression counts in the Hypothalamus. Heatmap (A) indicating hierarchical clustering of correlations between subsets of variables are described in the “Colour Key”, with positive (red), negative (blue) and weak shown as lighter colours. Relevance networks show the pair-wise similarity matrix of correlated positive (red) and negative (blue) variables. Behaviour and gene expression variables are represented as rectangles and ellipses respectively.

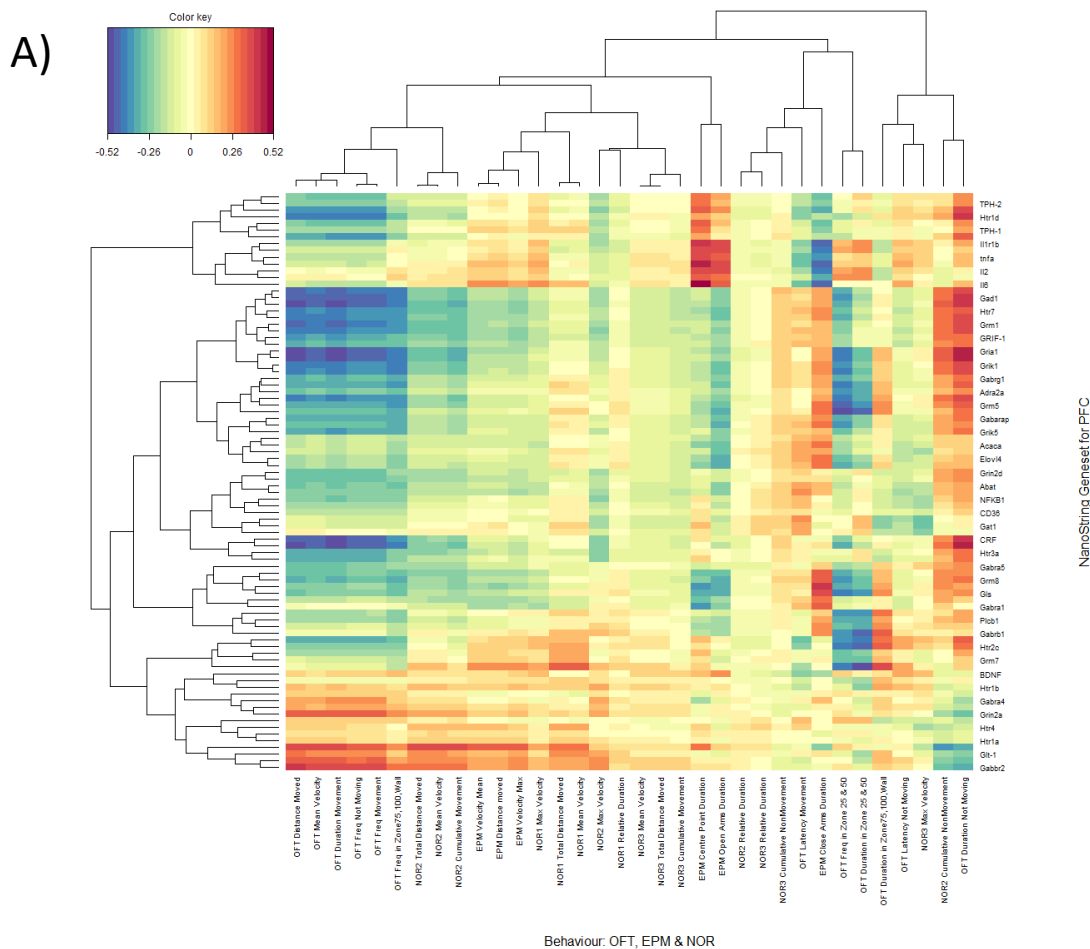

**B)**

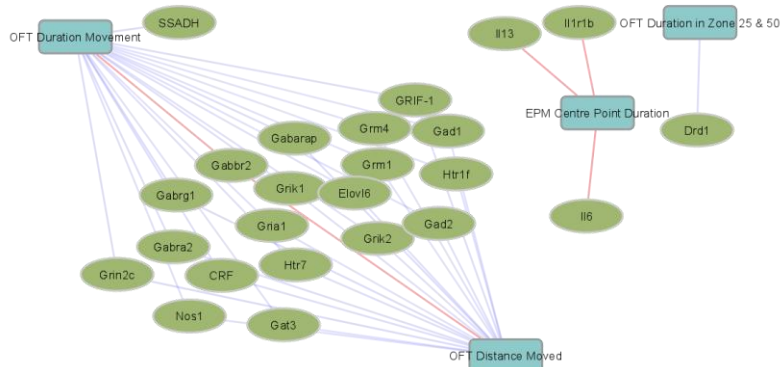

**Supplementary Figure S8.** Correlations obtained with sPLS – canonical on selected Behaviour measurements and gene expression counts in the PFC. Heatmap (A) indicating hierarchical clustering of correlations between subsets of variables are described in the “Colour Key”, with positive (red), negative (blue) and weak shown as lighter colours. Relevance networks show the pair-wise similarity matrix of correlated positive (red) and negative (blue) variables. Behaviour and gene expression variables are represented as rectangles and ellipses respectively.
